# Supplementary material for: Reliable detection of CNS lymphoma-derived circulating tumor DNA in cerebrospinal fluid using multi-biomarker NGS profiling: insights from a real-world study
Source: Springer Nature journal article supplement (doi:10.1186/s40364-025-00777-z), 2025-05-09

## Supplementary Figures

Suppl. Figure 1: Target regions of the updated and validated version of the LYNX panel.

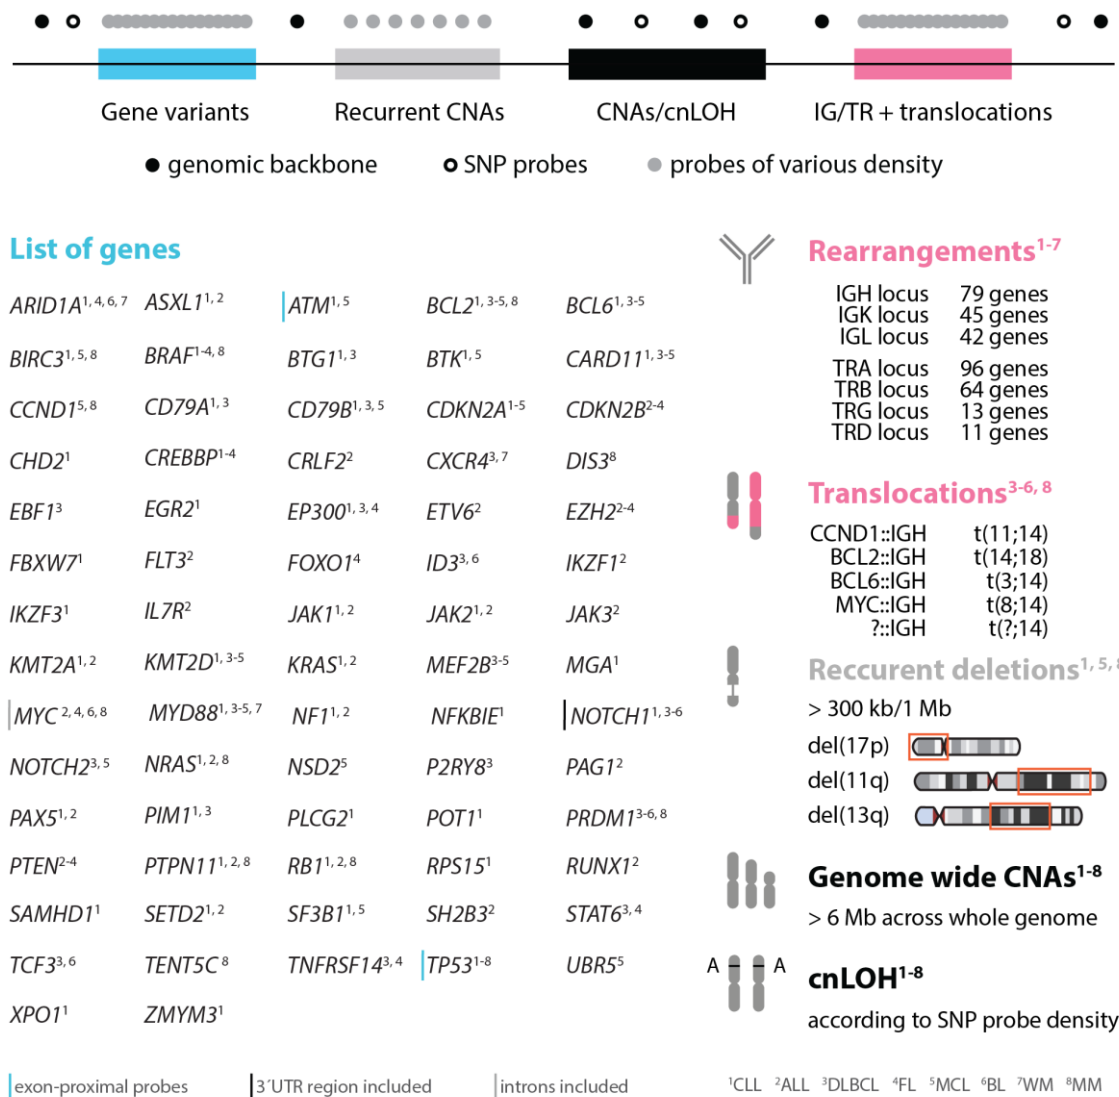

**Suppl. Figure 2: Differences in the level of cfDNA and ctDNA between PCNSL and SCNSL groups.** A) total cfDNA amount (ng) in CSF (p=0.99), B) total cfDNA amount (ng) in plasma (p=0.08), and C) ctDNA fraction (log hGE/ml) in CSF (p=0.68). Medians (red lines) are shown; \* outliers.

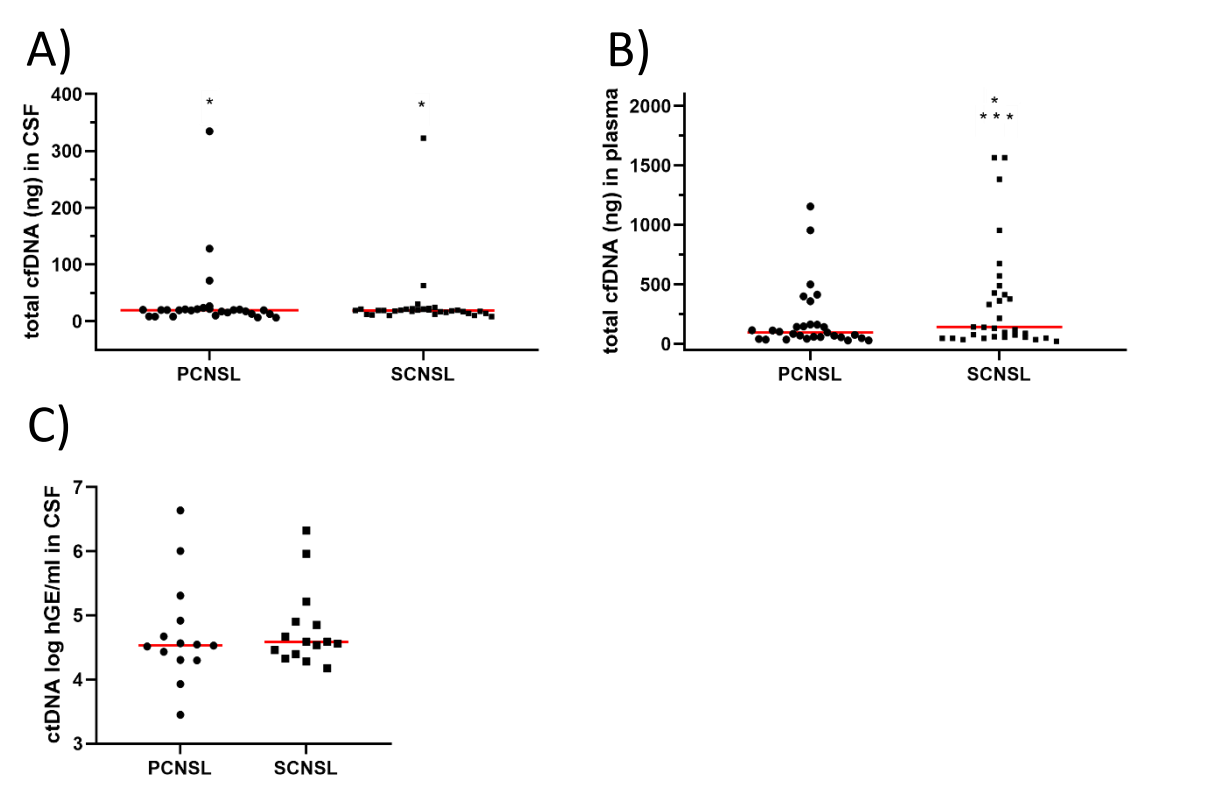

**Suppl. Figure 3: Comparison of the sensitivity to detect tumor infiltration by flow cytometry and CSF-ctDNA analysis restricted to patients who underwent both methods.** na\* not analyzed due to the low amount of gDNA from CSF pellet for NGS.

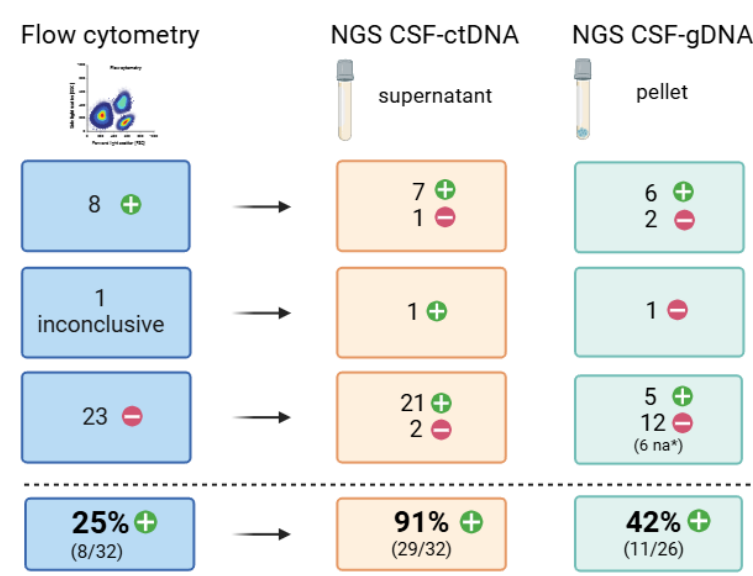

**Suppl. Figure 4: An illustrative example of complex karyotype ( $\geq 5$  defects) detected in CSF (A) and FFPE (B) samples of patient no. 113.**

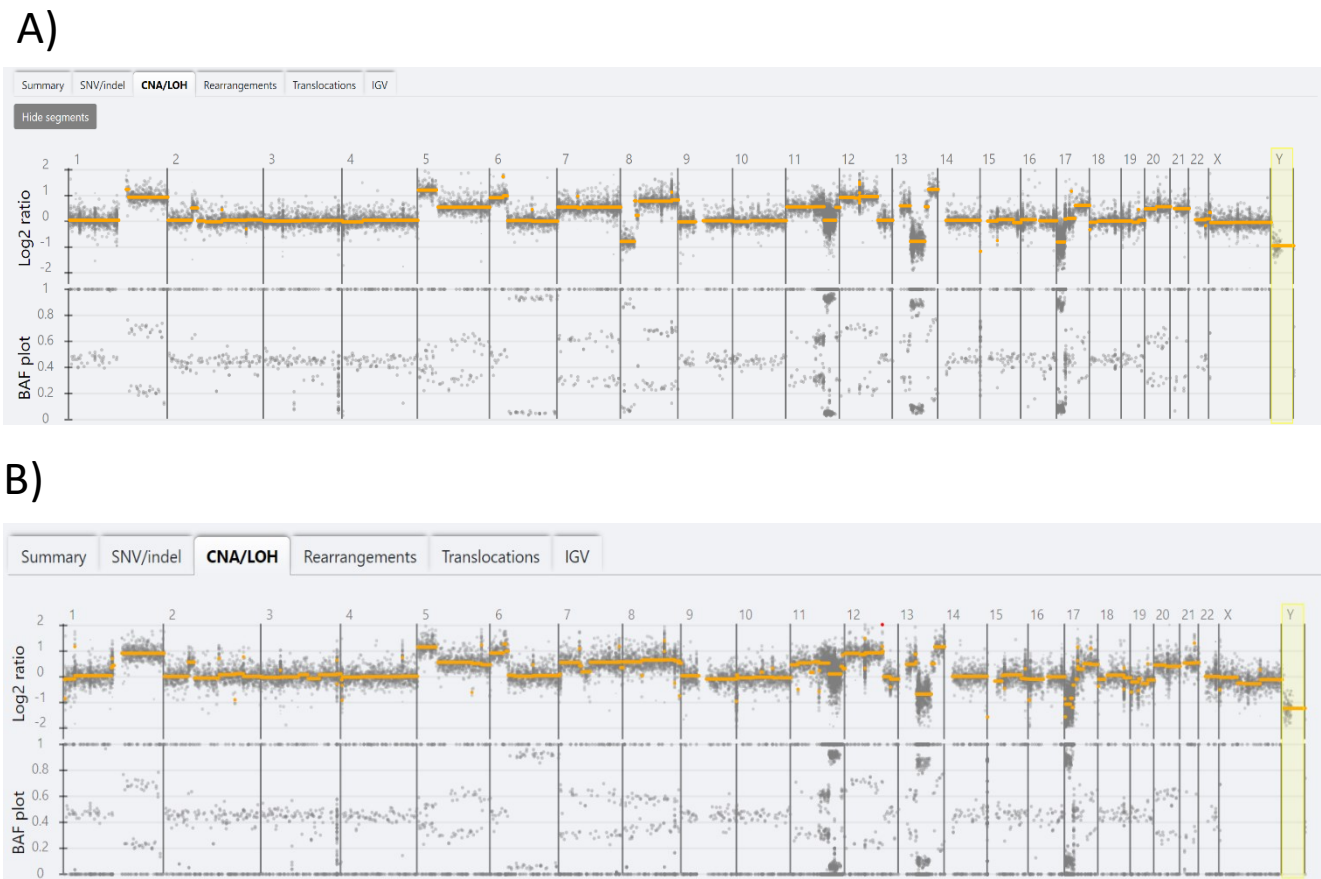

**Suppl. Figure 5: Overall survival according to detectable tumor DNA in A) CSF ctDNA/gDNA of all CNSL patients and B) baseline plasma ctDNA of SCNSL patients. Both analyses were not significant.**

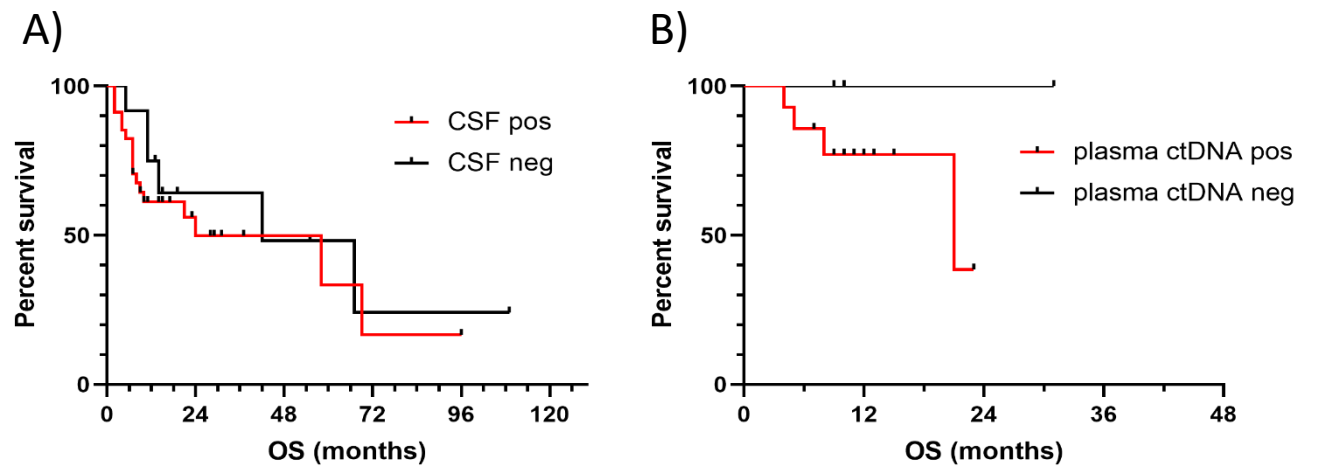

**Suppl. Figure 6: Event-free survival (EFS) in SCNSL patients experiencing CNS relapse according to the presence of detectable tumor DNA (ctDNA/gDNA) in CSF. Median 15 vs 40 months, non-significant.**

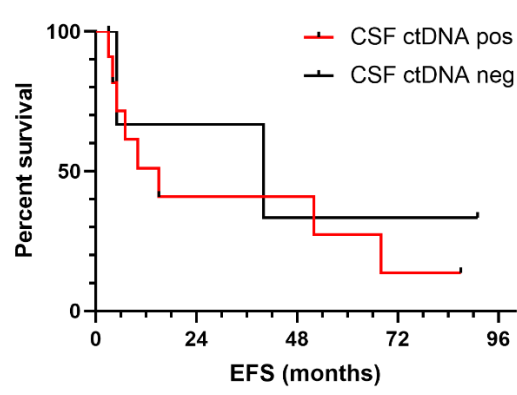

Supplement: MOESM2 [file 40364_2025_777_MOESM2_ESM.pdf]
